# Supplementary material
Source: publisher figshare collection journal article supplement (https://frontiersin.figshare.com/ndownloader/files/11174054)
Supplement: Supplementary file [file 11174054]

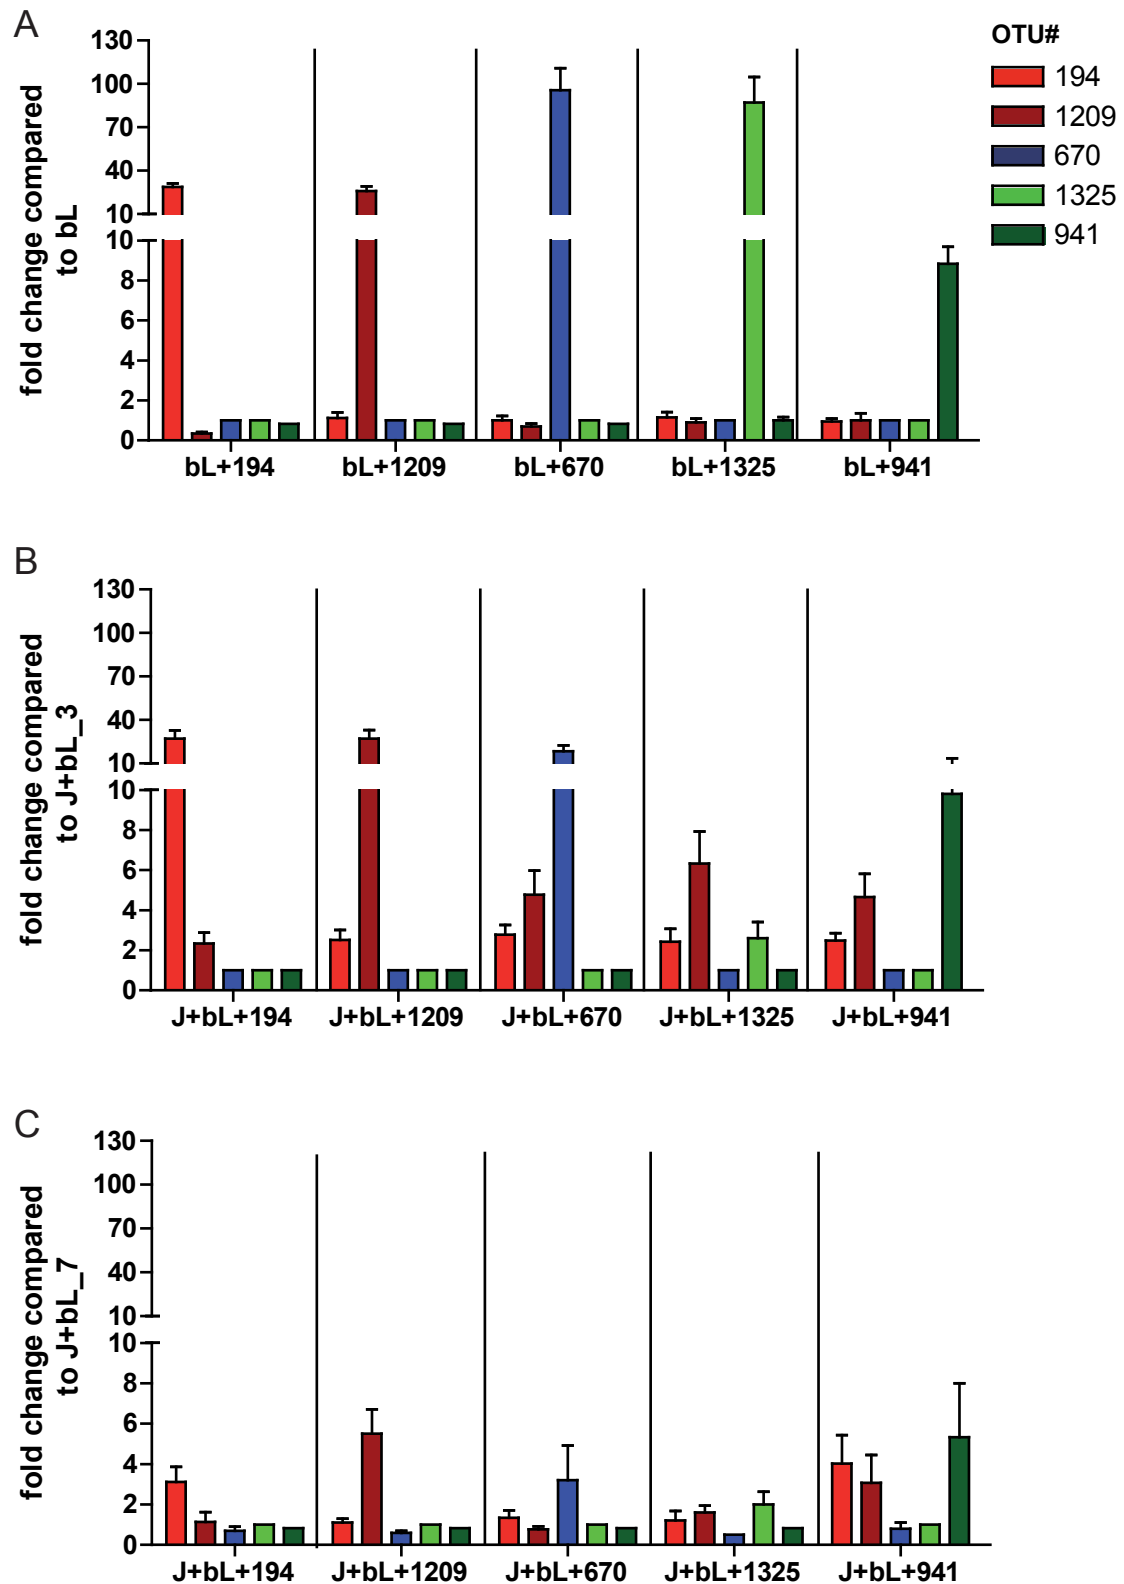

**Figure S3: Overrepresentation of isolates in inocula (A), 3dpr (B) and 7dpr (C) in comparison to control colonization.** Fold changes were calculated based on normalized sequencing counts of the representative OTUs (on 97% similarity).
